# Supplementary material for: BMP2 and BMP7 cooperate with H3.3K27M to promote quiescence and invasiveness in pediatric diffuse midline gliomas
Source: eLife. 2024 Oct 7;12:RP91313. doi: 10.7554/eLife.91313 (PMC11458179; doi:10.7554/eLife.91313)
Supplement: Supplementary file 1. — (a) List of the BMP target genes used for the heatmaps shown in Figure 1B and Figure 1—figure supplement 1B. (b) Average BMP ligand expression (natural log) per sample in the spatial transcriptomic dataset of DMG samples. (c) Normalized expression matrix (vst) of BMP pathway genes from cohort 3, including those shown in Figure 1—figure supplement 1E. (d) Histone mutation of samples from cohort 3. [file elife-91313-supp1.xlsx]

## Sheet: Supplementary File 1a
Supplementary File 1a – List of the BMP target genes used for the heatmaps shown in Figure 1B and Figure 1-figure supplement B
RUNX2
ID1
ID2
MSX1
SMAD7
GATA3
SMAD6
MSX2
ID3
ENG
SMAD1
GDF9
FSTL1
DSG4
BMP4
NEO1
SFRP4
GREM2
BMP6
SFRP2
FZD1
HIVEP1
ACVR2B
TNFAIP6
HFE
ZNF8
CHRDL2
ILK
LEF1
PPM1A
RGMB
TGFB2
MIR20A
MIR17
WNT1
KDR
SOX9
CHRDL1
GDF15
ATF2
SKI
ELAPOR2
COL2A1
MIR140
HJV
SMAD4
CHRD
UBE2O
DDX5
GDF7
GDF2
CRB2
TRIM33
EXT1
SULF1
TGFB1
SFRP5
DLX1
BMP8A
DLX3
SMAD2
TGFBR3
CCN1
RBPMS2
GREM1
NBL1
ACVR1
FST
COMP
BAMBI
NOG
LEFTY2
ABL1
MAPK3
FAM83G
TMEM53
FBXL15
SPINT1
SMAD9
USP1
FBN1
HOXA13
SORL1
DLX5
SMPD3
HES5
SMURF1
LEMD3
ZNF423
LRP2
BMP5
ITGA3
TGFB3
SPINT2
ACVRL1
BMPR2
SOSTDC1
HIPK2
GATA5
FSTL3
HEYL
GPC3
MIR21
NOTCH1
PPARG
BMPR1A
SFRP1
USP9Y
TFAP2B
LEMD2
CDH5
BMPER
SKOR2
MIR106A
MIR98
DAND5
HES1
XIAP
TMPRSS6
RGMA
WNT5A
HTRA1
SMAD3
CTDSPL2
PDCD4
BMP7
SCX
TWSG1
GDF5
UBE2D3
SLC39A5
PCSK6
VWC2
MEGF8
TBX20
GATA4
TOB1
BMP10
EGR1
KCP
MIR26A1
CER1
ADAMTS7
SMAD5
BMP8B
SCUBE3
GDF6
SOX11
NODAL
SMURF2
BMPR1B
GDF1
ETV2
TMEM100
PHOX2B
VSTM2A
RNF165
ADAMTS12
UBE2D1
BMP15
SPART
SKOR1
CRIM1
DKK1
RBPJ
NOTCH2
USP9X
MICOS10-NBL1
GATA6
GDF3
FKBP8
FOXD1
ACVR2A
HTRA3
BMP2
SKIL
PELO
NUMA1
SOST
VWC2L
LEFTY1
JUNB
BGLAP
SOX4
STAT1
CREB3L1
SP7
SNAI1
PITX2
PRRX2
HEY1
KLF10
TCF7

## Sheet: Supplementary File 1b
Supplementary File 1b – Average BMP ligand expression (natural log) per sample in the spatial transcriptomic dataset of DMG samples
	Sample-1	Sample-2	Sample-3
BMP2	0.376994	0.480492	0.261621
BMP4	0.0962702	0.0085603	0.0243288
BMP5	0.0131833	0.00286632	0
BMP7	0.4525	0.137462	0.292929
BMP8A	0.0432851	0.126538	0.055209
BMP8B	0.228914	0.174318	0.34688
BMP10	0	0	0
BMP15	0	0	0
GDF2	0.00343348	0	0
GDF5	0.00486001	0.00378025	0.00332728
GDF6	0.00393292	0	0.0014387
GDF7	0.00243015	0	0

## Sheet: Supplementary File 1c
Supplementary File 1c – Normalized expression matrix (vst) of BMP pathway genes from cohort 3, including those shown in Figure 1-figure supplement E
	Cohort-3_sample-1	Cohort-3_sample-2	Cohort-3_sample-3	Cohort-3_sample-4	Cohort-3_sample-5	Cohort-3_sample-6	Cohort-3_sample-7	Cohort-3_sample-8	Cohort-3_sample-9	Cohort-3_sample-10	Cohort-3_sample-11
BMP2	10.1063	10.2746	9.76073	11.5688	10.0236	10.4825	9.27732	9.41013	7.98275	9.41268	8.42549
BMP4	6.9625	7.72443	7.69277	6.89896	6.65355	6.30479	7.52211	6.78075	7.60344	6.84962	8.63135
BMP5	7.76865	6.50129	6.73622	6.07275	6.74777	6.5057	6.81538	6.33352	7.34795	8.43661	7.97184
BMP6	7.67949	6.77444	7.4329	6.98988	8.40971	7.20494	6.86786	7.38401	7.46901	8.03509	8.02512
BMP7	10.2701	9.71777	9.02099	8.00948	8.30075	9.98837	9.34434	9.477	10.0499	9.92511	9.38839
BMP8A	8.12883	6.69749	7.20296	8.20144	8.52652	7.99791	8.26983	7.47125	7.58643	7.1589	7.99343
BMP8B	8.53325	8.39082	8.8182	9.26334	8.56745	9.15012	9.21371	7.7148	7.34795	6.68965	8.87504
BMP10	6.59182	6.07275	6.23043	6.07275	6.07275	6.07275	6.07275	6.5232	6.07275	6.41243	6.07275
BMP15	6.07275	6.07275	6.07275	6.07275	6.07275	6.07275	6.60074	6.07275	6.07275	6.07275	6.07275
GDF2	6.54702	6.50129	6.07275	6.24016	6.45443	6.07275	6.44713	6.07275	6.07275	6.07275	6.80223
GDF5	6.91304	6.07275	6.59317	6.79533	6.69307	6.30479	6.40779	6.68064	6.74823	6.46469	6.23752
GDF6	6.07275	6.07275	6.07275	6.07275	6.34303	6.79962	6.07275	6.70725	6.42389	7.47475	7.14169
GDF7	6.07275	6.07275	6.07275	6.07275	6.67365	6.07275	6.36306	6.48423	6.07275	6.07275	6.07275
NOG	7.32868	7.34209	7.39253	8.00948	7.30459	7.75934	6.75853	7.22425	6.92266	6.07275	7.11814
CHRD	9.4617	10.2361	8.86984	8.9747	9.17433	8.89168	8.43371	9.37184	9.55794	7.72768	9.25833
CHRDL1	9.72641	9.76702	8.77	7.49398	9.00675	7.48486	10.7212	9.52571	8.61681	10.0618	10.7884
BAMBI	10.4854	7.89353	9.6133	10.7761	9.14606	10.648	9.84275	9.39351	8.86267	9.65966	10.5415
FST	7.31258	6.07275	7.2795	7.82148	6.34303	7.43461	7.16051	7.34932	6.791	7.59772	6.53704
FSTL1	10.8565	10.576	10.9014	11.1296	10.3774	10.2389	11.7896	11.1276	10.0931	11.0271	10.5794
SMAD6	8.85785	7.60856	8.05816	8.11409	8.76352	7.86396	7.62467	7.90906	8.71203	7.33593	8.31769
SMAD7	8.66282	8.78324	8.19903	8.67074	8.82138	8.6499	8.54736	8.75025	9.44325	8.83235	8.24501
GREM1	6.07275	7.19387	8.14365	9.61134	6.71186	9.66575	6.30992	6.84681	6.67801	6.07275	6.07275
GREM2	7.26265	6.87521	6.07275	6.67238	6.07275	6.07275	6.54552	7.03203	6.07275	6.07275	6.07275
BMPER	11.0698	8.29562	10.7078	10.437	8.09179	12.7972	9.88949	11.35	9.92705	9.7233	10.5044
CER1	6.54702	7.03048	6.42465	6.84904	6.22895	6.30479	6.75853	6.5232	6.50229	6.07275	7.56115
SMURF1	10.4387	10.3739	10.5484	9.83553	10.7183	11.1167	10.486	10.8211	10.5643	10.0171	10.8475
SMURF2	11.2906	11.2269	11.7126	11.3777	11.3405	11.4931	11.5198	11.5899	11.8036	11.559	11.8344
SKI	11.0519	11.0693	9.87333	11.6736	11.5413	11.3917	11.6691	11.1032	11.3056	11.5349	11.0705
BMPR1A	10.637	10.0653	9.70862	11.1757	10.5125	10.7058	10.8185	9.84065	11.1501	10.3672	9.87681
BMPR1B	11.1989	11.2453	11.0983	11.8238	11.0988	11.2962	10.4018	11.0305	11.2562	11.4465	11.2527
BMPR2	12.7893	12.457	12.697	12.8827	12.7226	13.0575	12.8737	12.5512	13.1272	12.7433	13.0635
ACVR1	10.277	10.5275	10.6085	10.334	10.1915	10.5344	10.7094	10.6422	9.80242	10.5434	10.0454
ACVRL1	8.93934	9.02456	8.67408	8.58206	9.41454	8.2983	9.70529	8.58974	8.29725	8.18093	8.12055
ACVR2A	9.99611	10.0676	10.9428	10.6985	10.2282	10.9207	10.1844	11.1635	10.5871	11.1362	11.184
ACVR2B	9.16233	8.88805	9.78079	9.47518	9.84969	9.70576	9.6569	9.62852	9.65325	10.1913	9.76255
SMAD1	10.9771	10.4332	10.3874	11.1349	10.776	10.7312	11.0479	10.6699	11.1552	10.519	11.1408
SMAD5	11.6524	11.3128	11.102	11.8278	11.1963	11.3255	11.3712	11.8128	12.1626	11.6285	11.6654
SMAD9	10.7571	10.8501	10.0814	10.9075	11.123	10.6745	10.4441	9.31239	10.3623	11.015	10.6243
SMAD4	10.7946	10.4781	10.3822	10.8834	10.798	10.6582	10.8337	10.1792	11.2609	9.79651	10.9659
ZFYVE16	12.7548	12.4777	13.1382	12.5031	13.3832	13.6293	12.507	12.0823	12.541	12.5566	12.68

## Sheet: Supplementary File 1d
Supplementary File 1d – Histone mutation of samples from cohort 3
Sample_ID	Histone_mutation
Cohort-3_sample-1	H3.3 K27M
Cohort-3_sample-2	H3.3 K27M
Cohort-3_sample-3	H3.3 K27M
Cohort-3_sample-4	H3.3 K27M
Cohort-3_sample-5	H3.3 K27M
Cohort-3_sample-6	H3.2 K27M
Cohort-3_sample-7	H3.3 K27M
Cohort-3_sample-8	H3.3 K27M
Cohort-3_sample-9	H3.1 K27M
Cohort-3_sample-10	H3.3 K27M
Cohort-3_sample-11	H3.3 K27M
