# Supplementary figures and images for: BMP2 and BMP7 cooperate with H3.3K27M to promote quiescence and invasiveness in pediatric diffuse midline gliomas
Source: eLife journal article supplement (doi:10.7554/elife.91313), 2023-11-23

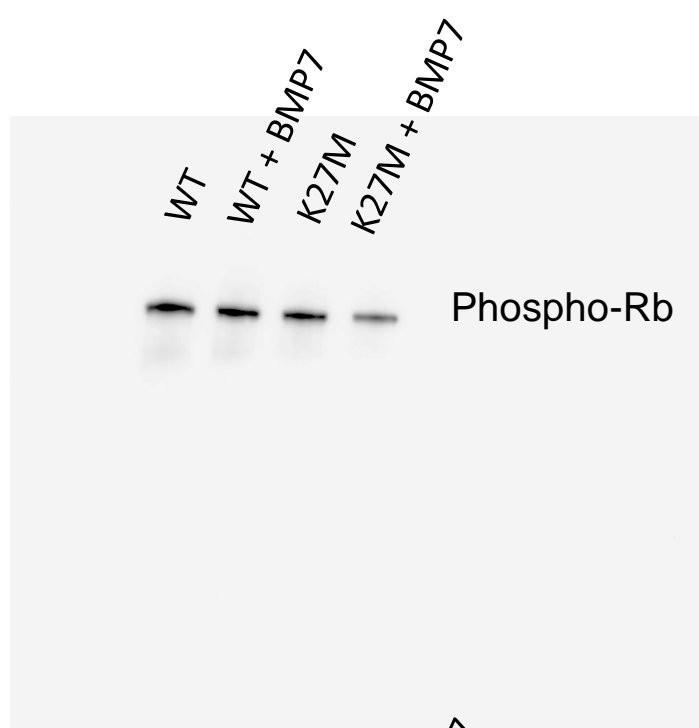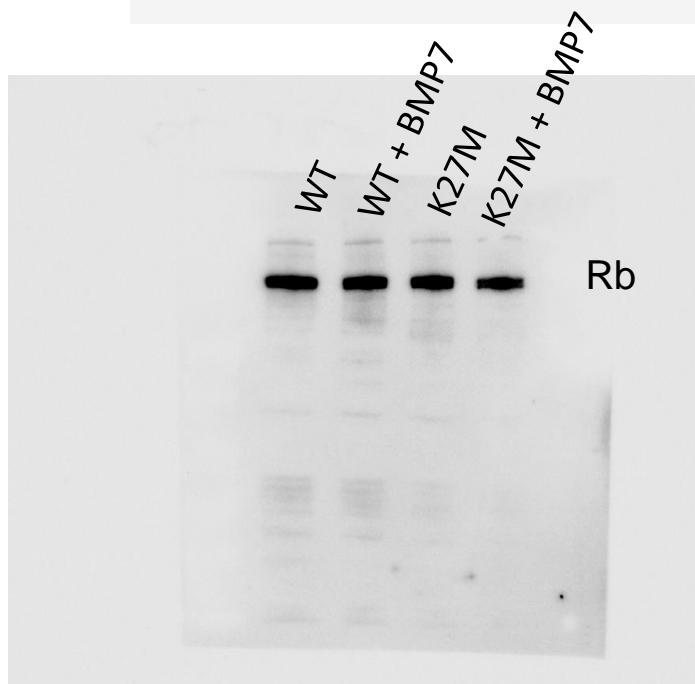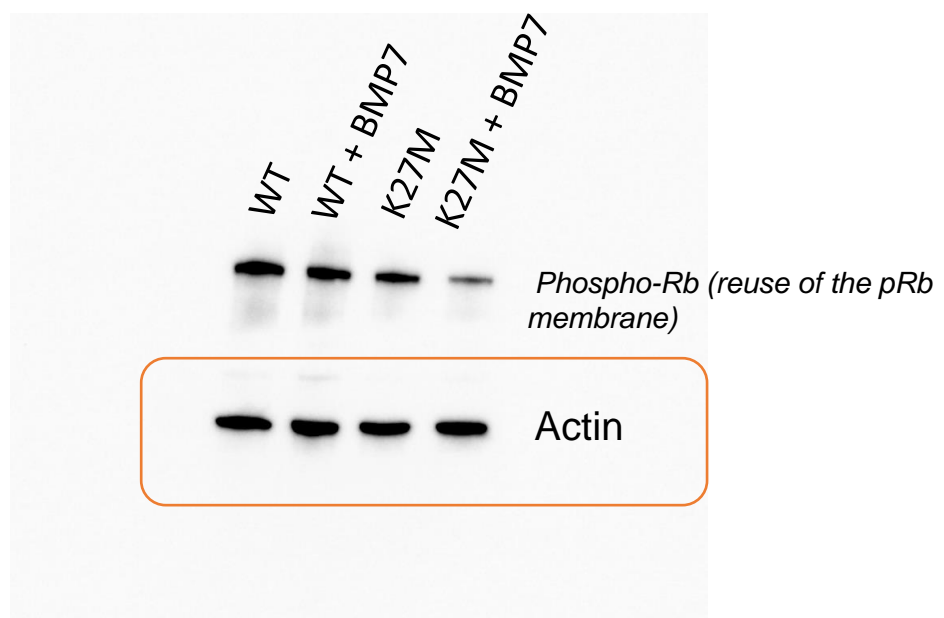

Supplement: fig2-data1 [file elife-91313-fig2-data1-v1.zip]

pSMAD1/5/8

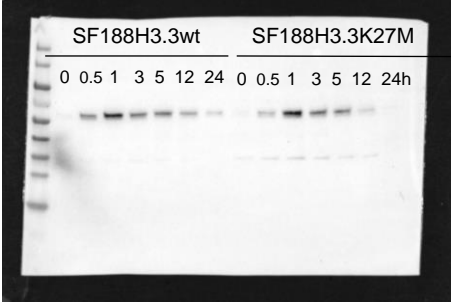

SMAD1

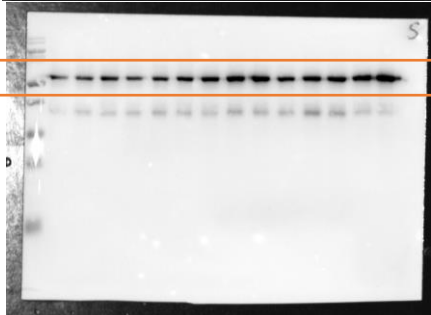

Actin

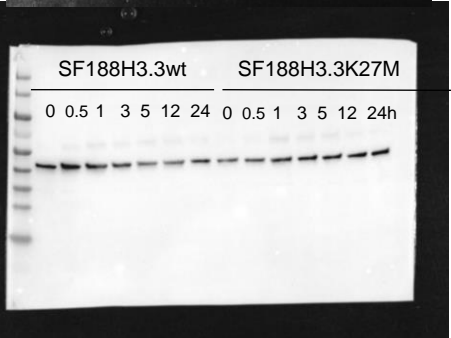

pSMAD1/5/8

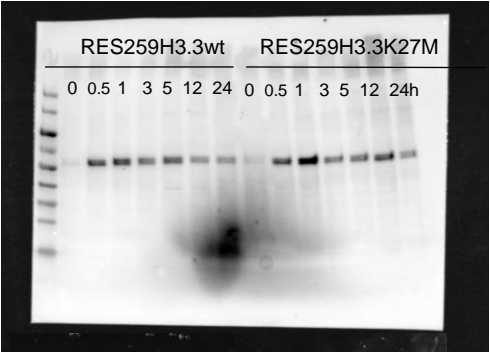

SMAD1

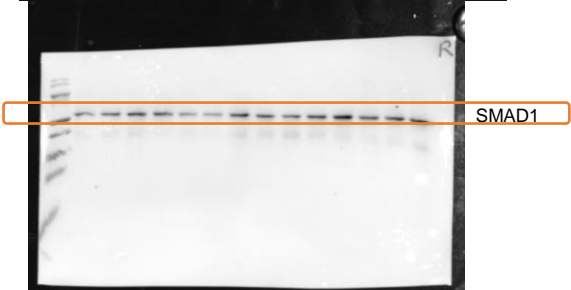

pSMAD1/5/8 band (reuse of the pSMAD membrane)

Actin

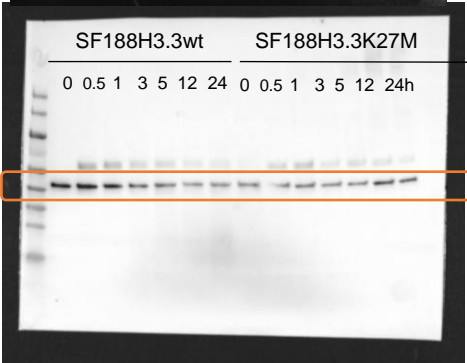

Supplement: fig2-figsupp1-data1 [file elife-91313-fig2-figsupp1-data1-v1.zip]

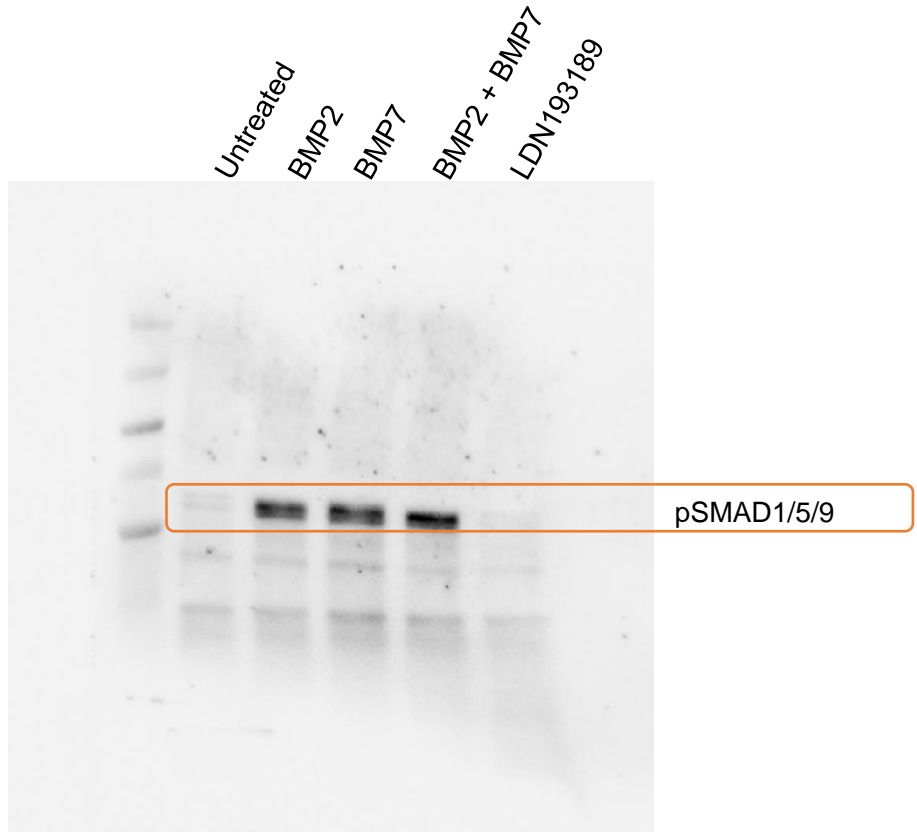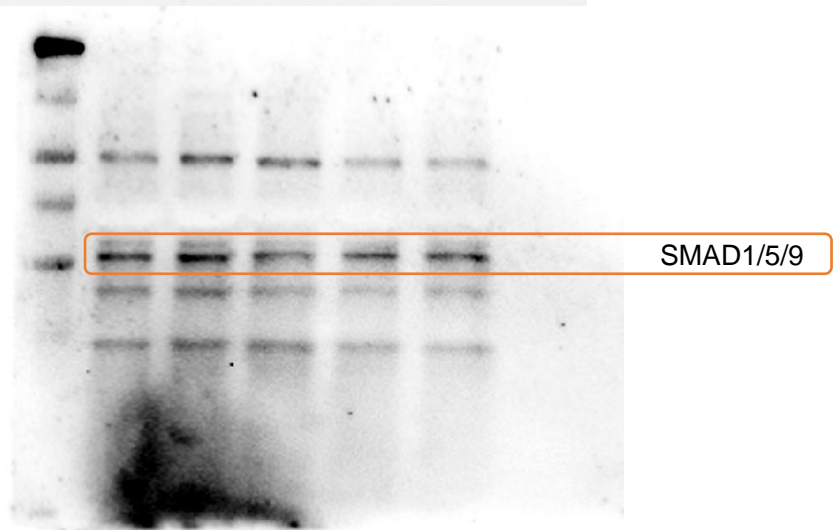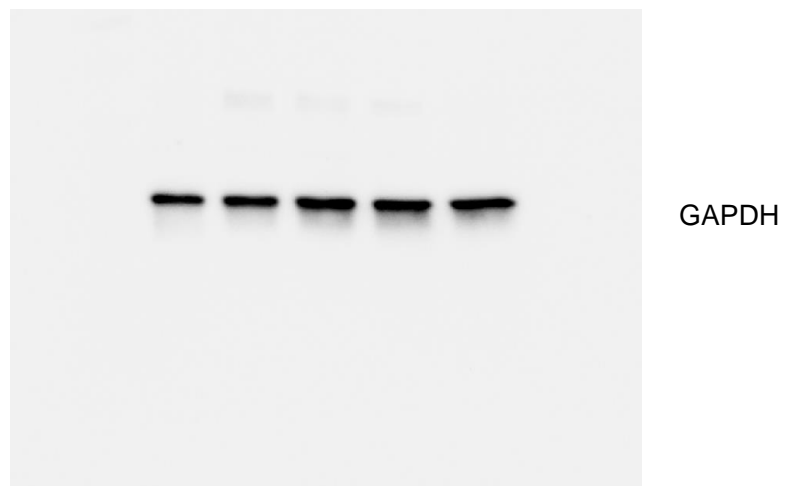

Supplement: fig3-figsupp1-data1 [file elife-91313-fig3-figsupp1-data1-v1.zip]
